# Supplementary material
Source: PubMed Central journal article supplement (PMC4775112)
Supplement: supp_pp.15.01308_01308suppfigs.pdf [file supp_pp.15.01308_01308suppfigs.pdf]

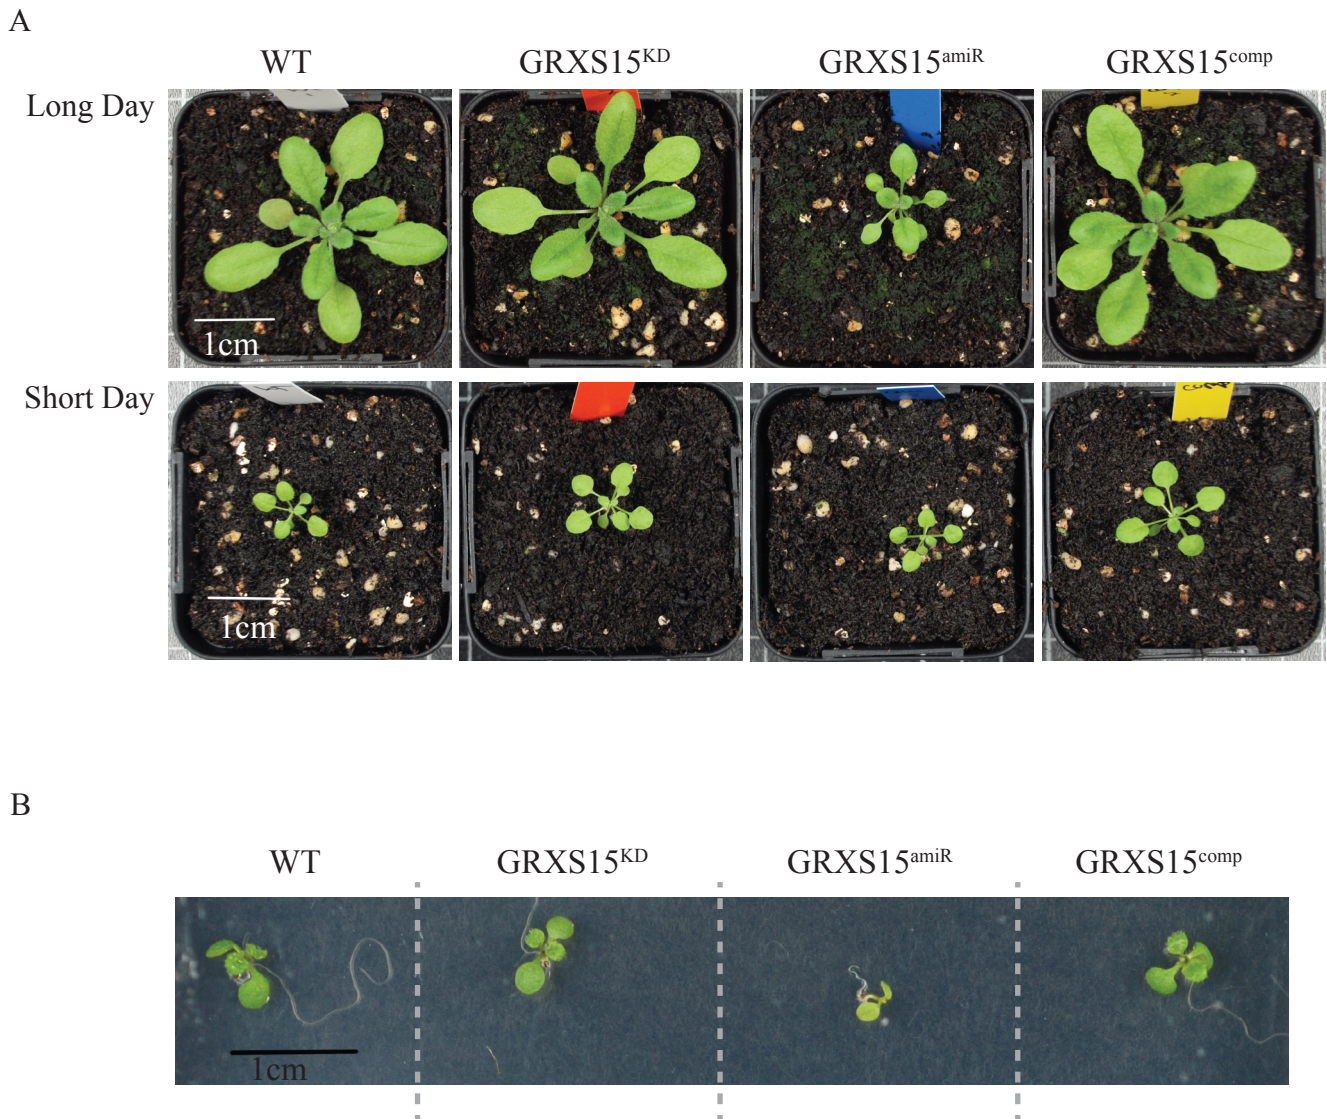

### Supplementary Figure 1

Phenotypic analysis of WT, GrxS15<sup>KD</sup>, GrxS15<sup>amiR</sup> and GrxS15<sup>comp</sup>. Plants were grown under (A) long and short day conditions on soil and (B) long day conditions on MS agar plates. Exemplary images are shown.

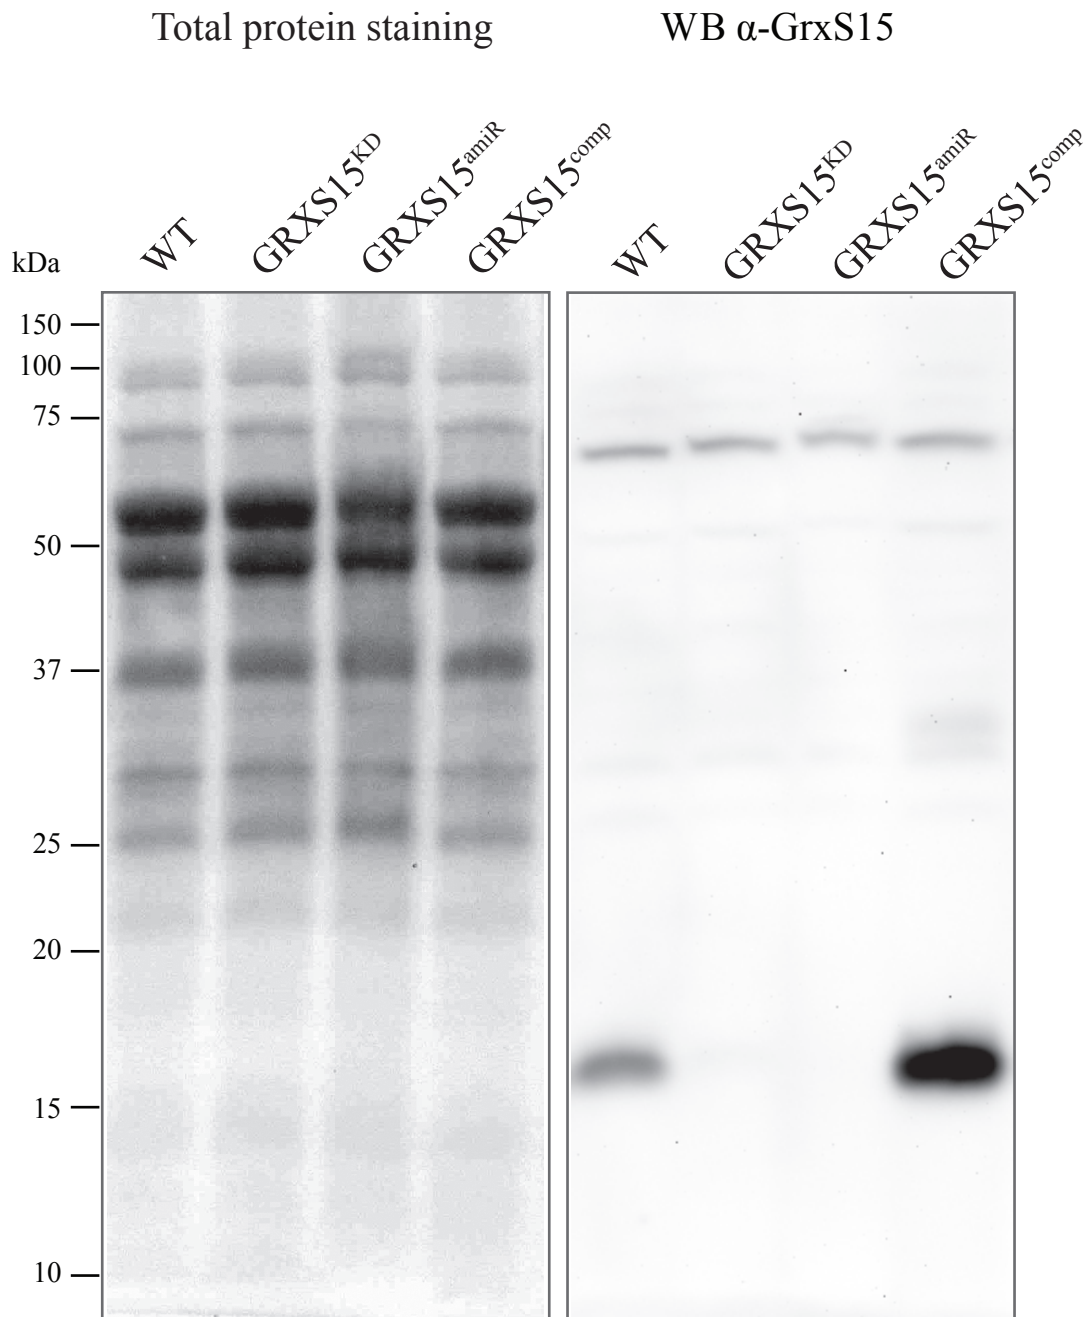

**Supplementary Figure 2**

Western blot of mitochondria isolated from whole tissue of WT, GrxS15<sup>KD</sup>, GrxS15<sup>amiR</sup> and GrxS15<sup>comp</sup> using specific antibodies raised against GrxS15 (right). On the left, total protein staining of the membrane was performed with Ponceau and used for normalisation. N=4, exemplary image shown.

A

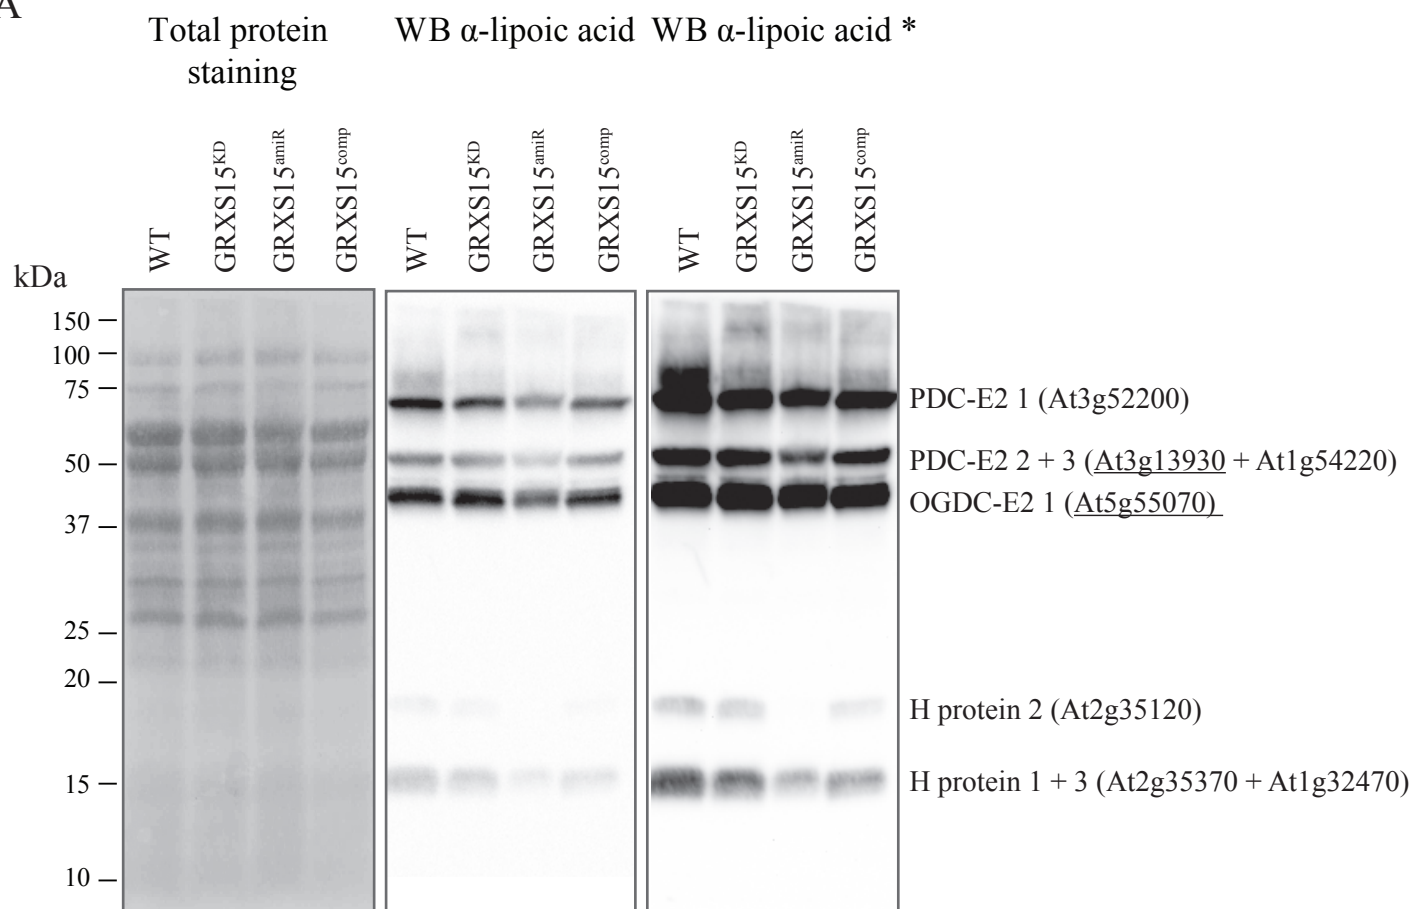

B

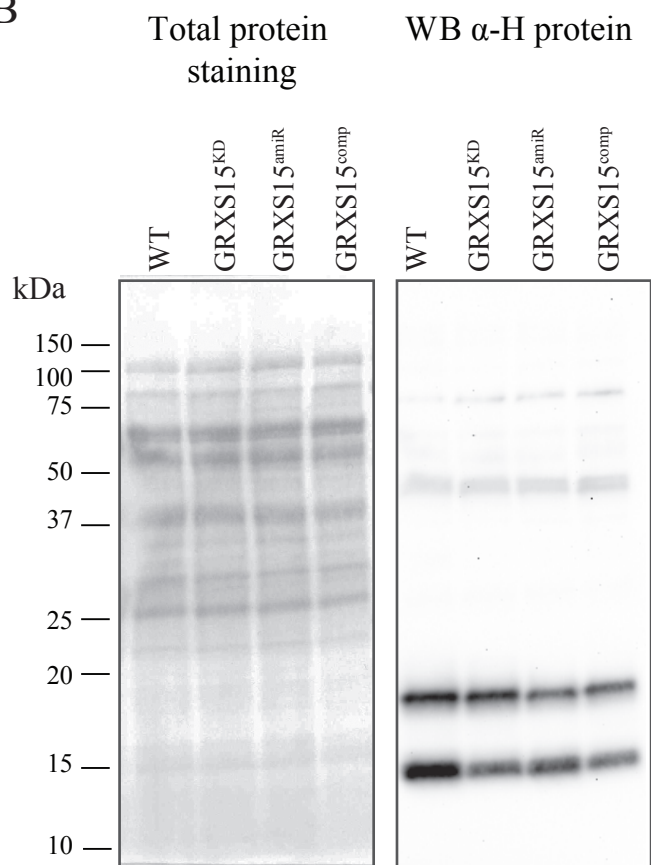

### Supplementary Figure 3

Western blot of isolated mitochondria from whole tissue of WT, GrxS15<sup>KD</sup>, GrxS15<sup>amiR</sup> and GrxS15<sup>comp</sup> using specific antibodies raised against lipoic acid (A) and H protein (B). On the left, total protein staining of the membrane was performed with Ponceau and used for normalisation. On the right, the fluorescent signal can be seen. In A, images are taken with different exposure times, \* indicates the longer exposure time. Bands are labelled with protein name and AGI number. N=4 (anti-H protein), N=6 (anti-lipoic acid), exemplary images are shown.

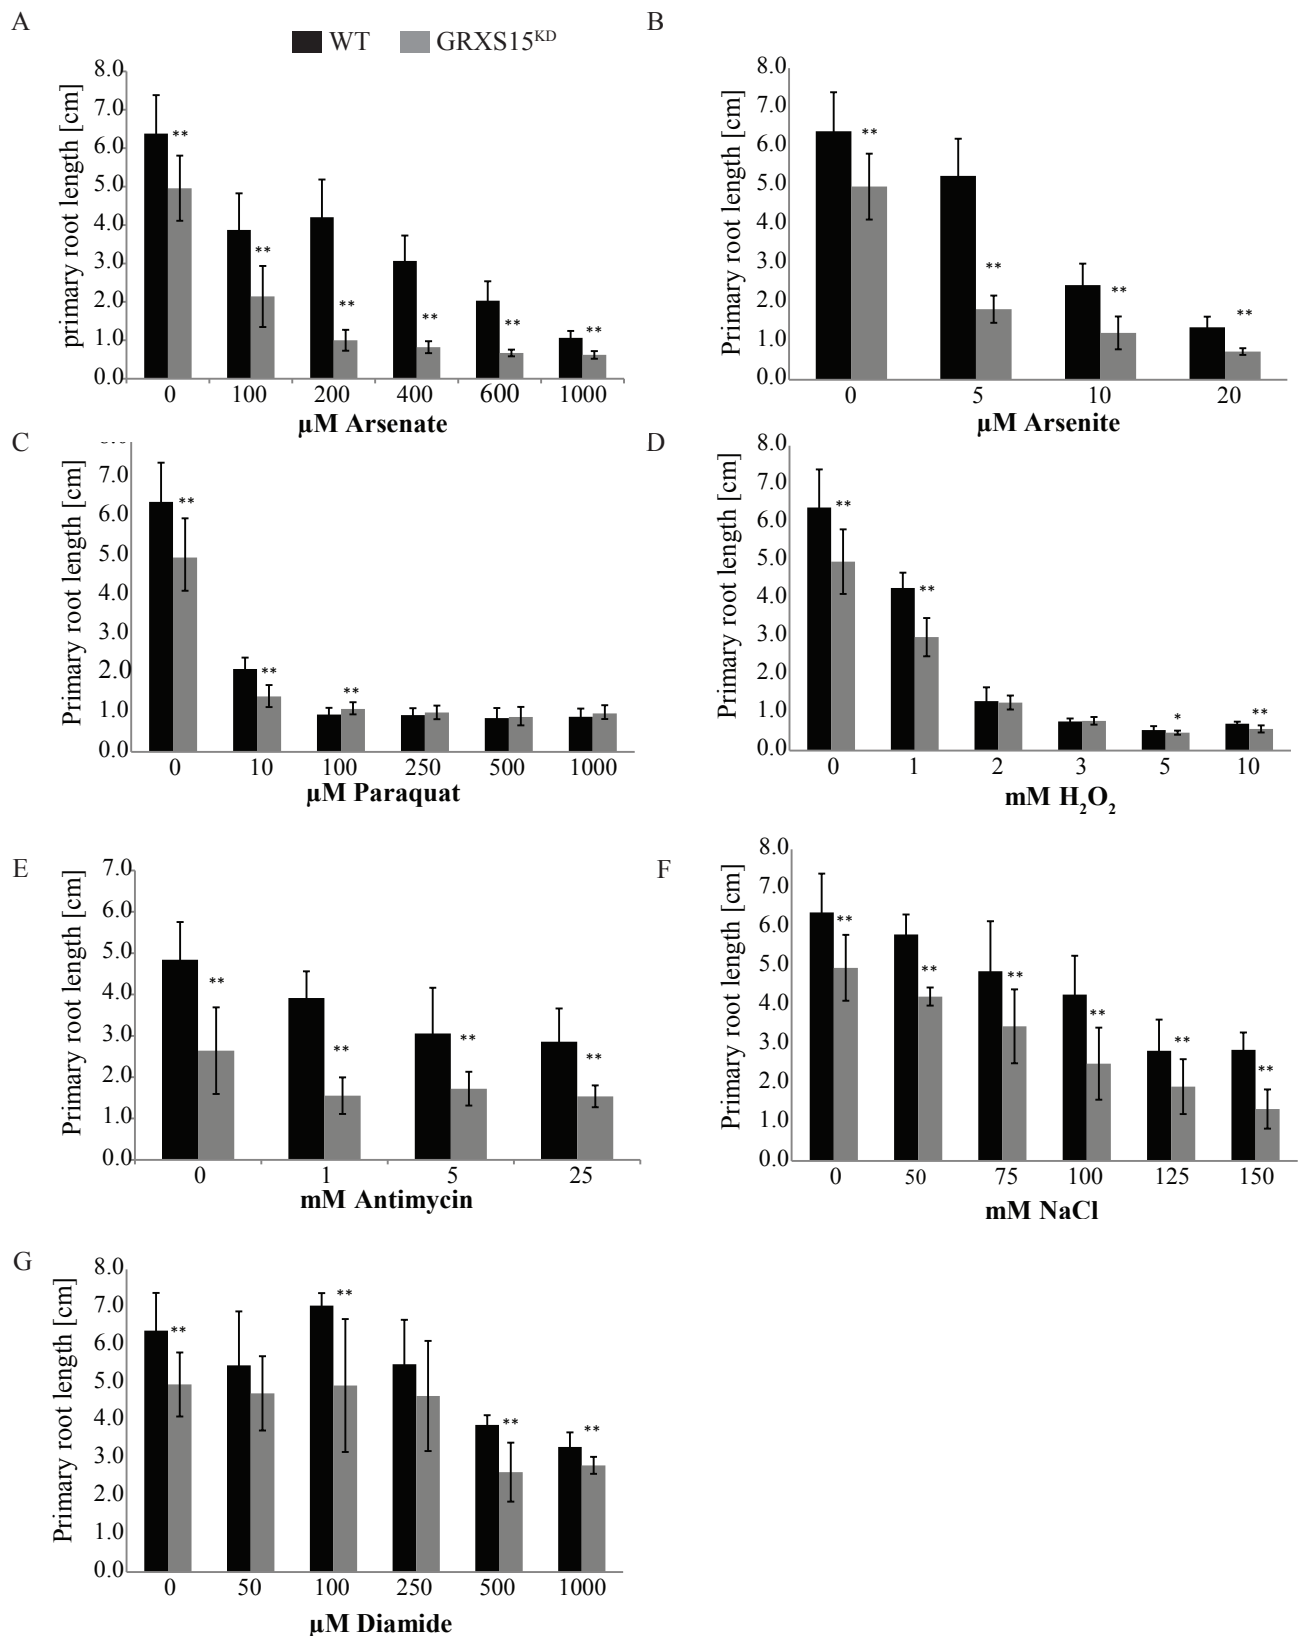

### Supplementary Figure 4

Analysis of primary root length of WT and GRXS15<sup>KD</sup> grown on vertical MS agar plates for 10 d under medium day growth conditions. Different concentrations of the following effectors have been used: Arsenate (A), Arsenite (B), Paraquat (C), H<sub>2</sub>O<sub>2</sub> (D), Antimycin (E), NaCl (F) and Diamide (G). Average and standard deviation are displayed. Student's *t*-test were performed, \* indicates  $p < 0.05$  \*\* indicates  $p < 0.01$ ,  $n = 6-32$ .

**Supplementary Figure 5.** A two –way ANOVA with Tukey post hoc test for the rosette area data set using IBM SPSS version 21.

**Tests of Between-Subjects Effects**

Dependent Variable: area

| Source               | Type III Sum of Squares | df  | Mean Square | F        | Sig. |
|----------------------|-------------------------|-----|-------------|----------|------|
| Corrected Model      | 22789.121 <sup>a</sup>  | 11  | 2071.738    | 74.672   | .000 |
| Intercept            | 53768.543               | 1   | 53768.543   | 1937.991 | .000 |
| genotype             | 14845.390               | 3   | 4948.463    | 178.359  | .000 |
| treatment            | 6393.443                | 2   | 3196.722    | 115.220  | .000 |
| genotype * treatment | 1600.479                | 6   | 266.747     | 9.614    | .000 |
| Error                | 5992.806                | 216 | 27.744      |          |      |
| Total                | 80714.948               | 228 |             |          |      |
| Corrected Total      | 28781.927               | 227 |             |          |      |

a. R Squared = .792 (Adjusted R Squared = .781)

**Post Hoc Tests**

**genotype**

**Multiple Comparisons**

Dependent Variable: area

Tukey HSD

| (I) genotype | (J) genotype | Mean Difference (I-J) | Std. Error | Sig. | 95% Confidence Interval |             |
|--------------|--------------|-----------------------|------------|------|-------------------------|-------------|
|              |              |                       |            |      | Lower Bound             | Upper Bound |
| WT           | GrxS15KD     | 11.6594*              | .99105     | .000 | 9.0934                  | 14.2253     |
|              | GrxS15amiR   | 21.0883*              | .98666     | .000 | 18.5337                 | 23.6429     |
|              | GrxS15comp   | 4.0822*               | .98239     | .000 | 1.5386                  | 6.6257      |
| GrxS15KD     | WT           | -11.6594*             | .99105     | .000 | -14.2253                | -9.0934     |
|              | GrxS15amiR   | 9.4289*               | .99105     | .000 | 6.8630                  | 11.9949     |
|              | GrxS15comp   | -7.5772*              | .98681     | .000 | -10.1322                | -5.0222     |
| GrxS15amiR   | WT           | -21.0883*             | .98666     | .000 | -23.6429                | -18.5337    |
|              | GrxS15KD     | -9.4289*              | .99105     | .000 | -11.9949                | -6.8630     |
|              | GrxS15comp   | -17.0061*             | .98239     | .000 | -19.5497                | -14.4626    |
| GrxS15comp   | WT           | -4.0822*              | .98239     | .000 | -6.6257                 | -1.5386     |
|              | GrxS15KD     | 7.5772*               | .98681     | .000 | 5.0222                  | 10.1322     |
|              | GrxS15amiR   | 17.0061*              | .98239     | .000 | 14.4626                 | 19.5497     |

Based on observed means.

The error term is Mean Square(Error) = 27.744.

\*. The mean difference is significant at the 0.05 level.

**treatment**

**Multiple Comparisons**

Dependent Variable: area

Tukey HSD

| (I) treatment   | (J) treatment   | Mean Difference (I-J) | Std. Error | Sig. | 95% ...     |
|-----------------|-----------------|-----------------------|------------|------|-------------|
|                 |                 |                       |            |      | Lower Bound |
| control         | 5 uM arsenite   | 11.7518*              | .86539     | .000 | 9.7095      |
|                 | 200 uM arsenate | 11.5166*              | .86792     | .000 | 9.4683      |
| 5 uM arsenite   | control         | -11.7518*             | .86539     | .000 | -13.7941    |
|                 | 200 uM arsenate | -.2351                | .83546     | .957 | -2.2068     |
| 200 uM arsenate | control         | -11.5166*             | .86792     | .000 | -13.5649    |
|                 | 5 uM arsenite   | .2351                 | .83546     | .957 | -1.7366     |

**Supplementary Figure 6.** A two –way ANOVA with Tukey post hoc test for the root length data set using IBM SPSS version 21.

**Tests of Between-Subjects Effects**

Dependent Variable: rootlength

| Source               | Type III Sum of Squares | df  | Mean Square | F        | Sig. |
|----------------------|-------------------------|-----|-------------|----------|------|
| Corrected Model      | 291.777 <sup>a</sup>    | 11  | 26.525      | 258.134  | .000 |
| Intercept            | 625.019                 | 1   | 625.019     | 6082.474 | .000 |
| genotype             | 153.394                 | 3   | 51.131      | 497.595  | .000 |
| treatment            | 113.270                 | 2   | 56.635      | 551.154  | .000 |
| genotype * treatment | 27.207                  | 6   | 4.534       | 44.128   | .000 |
| Error                | 34.115                  | 332 | .103        |          |      |
| Total                | 948.197                 | 344 |             |          |      |
| Corrected Total      | 325.893                 | 343 |             |          |      |

a. R Squared = .895 (Adjusted R Squared = .892)

**Post Hoc Tests**

**genotype**

**Multiple Comparisons**

Dependent Variable: rootlength  
Tukey HSD

| (I) genotype | (J) genotype | Mean Difference (I-J) | Std. Error | Sig. | 95% Confidence Interval |             |
|--------------|--------------|-----------------------|------------|------|-------------------------|-------------|
|              |              |                       |            |      | Lower Bound             | Upper Bound |
| WT           | GrxS15KD     | 1.0286 <sup>*</sup>   | .04891     | .000 | .9023                   | 1.1549      |
|              | GrxS15amir   | 1.7767 <sup>*</sup>   | .04947     | .000 | 1.6489                  | 1.9044      |
|              | GrxS15comp   | .4321 <sup>*</sup>    | .04918     | .000 | .3051                   | .5591       |
| GrxS15KD     | WT           | -1.0286 <sup>*</sup>  | .04891     | .000 | -1.1549                 | -.9023      |
|              | GrxS15amir   | .7480 <sup>*</sup>    | .04862     | .000 | .6225                   | .8736       |
|              | GrxS15comp   | -.5965 <sup>*</sup>   | .04833     | .000 | -.7213                  | -.4717      |
| GrxS15amir   | WT           | -1.7767 <sup>*</sup>  | .04947     | .000 | -1.9044                 | -1.6489     |
|              | GrxS15KD     | -.7480 <sup>*</sup>   | .04862     | .000 | -.8736                  | -.6225      |
|              | GrxS15comp   | -1.3445 <sup>*</sup>  | .04889     | .000 | -1.4708                 | -1.2183     |
| GrxS15comp   | WT           | -.4321 <sup>*</sup>   | .04918     | .000 | -.5591                  | -.3051      |
|              | GrxS15KD     | .5965 <sup>*</sup>    | .04833     | .000 | .4717                   | .7213       |
|              | GrxS15amir   | 1.3445 <sup>*</sup>   | .04889     | .000 | 1.2183                  | 1.4708      |

Based on observed means.

The error term is Mean Square(Error) = .103.

\*. The mean difference is significant at the 0.05 level.

**treatment**

**Multiple Comparisons**

Dependent Variable: rootlength  
Tukey HSD

| (I) treatment   | (J) treatment   | Mean Difference (I-J) | Std. Error | Sig. | 95% ...     |
|-----------------|-----------------|-----------------------|------------|------|-------------|
|                 |                 |                       |            |      | Lower Bound |
| control         | 5 uM arsenite   | 1.3890 <sup>*</sup>   | .04228     | .000 | 1.2895      |
|                 | 200 uM arsenate | .6444 <sup>*</sup>    | .04228     | .000 | .5448       |
| 5 uM arsenite   | control         | -1.3890 <sup>*</sup>  | .04228     | .000 | -1.4886     |
|                 | 200 uM arsenate | -.7447 <sup>*</sup>   | .04246     | .000 | -.8446      |
| 200 uM arsenate | control         | -.6444 <sup>*</sup>   | .04228     | .000 | -.7439      |
|                 | 5 uM arsenite   | .7447 <sup>*</sup>    | .04246     | .000 | .6447       |

**Supplementary Figure 7.** A two –way ANOVA with Tukey post hoc test for the root tip respiration data set using IBM SPSS version 21.

### Tests of Between-Subjects Effects

Dependent Variable: normOCR

| Source               | Type III Sum of Squares | df  | Mean Square | F       | Sig. |
|----------------------|-------------------------|-----|-------------|---------|------|
| Corrected Model      | 2020072.53 <sup>a</sup> | 11  | 183642.958  | 23.866  | .000 |
| Intercept            | 4193625.822             | 1   | 4193625.822 | 544.995 | .000 |
| genotype             | 1562016.074             | 3   | 520672.025  | 67.665  | .000 |
| treatment            | 225323.739              | 2   | 112661.870  | 14.641  | .000 |
| genotype * treatment | 147410.496              | 6   | 24568.416   | 3.193   | .005 |
| Error                | 2008341.569             | 261 | 7694.795    |         |      |
| Total                | 9063262.953             | 273 |             |         |      |
| Corrected Total      | 4028414.103             | 272 |             |         |      |

a. R Squared = .501 (Adjusted R Squared = .480)

### Post Hoc Tests

#### genotype

#### Multiple Comparisons

Dependent Variable: normOCR

Tukey HSD

| (I) genotype | (J) genotype | Mean Difference (I-J)  | Std. Error | Sig. | 95% Confidence Interval |             |
|--------------|--------------|------------------------|------------|------|-------------------------|-------------|
|              |              |                        |            |      | Lower Bound             | Upper Bound |
| WT           | GrxS15KD     | 8.1693                 | 15.10320   | .949 | -30.8824                | 47.2210     |
|              | GrxS15amiR   | 120.1868 <sup>*</sup>  | 15.10320   | .000 | 81.1351                 | 159.2385    |
|              | GrxS15comp   | -97.9660 <sup>*</sup>  | 15.10320   | .000 | -137.0177               | -58.9143    |
| GrxS15KD     | WT           | -8.1693                | 15.10320   | .949 | -47.2210                | 30.8824     |
|              | GrxS15amiR   | 112.0175 <sup>*</sup>  | 14.93444   | .000 | 73.4021                 | 150.6329    |
|              | GrxS15comp   | -106.1353 <sup>*</sup> | 14.93444   | .000 | -144.7506               | -67.5199    |
| GrxS15amiR   | WT           | -120.1868 <sup>*</sup> | 15.10320   | .000 | -159.2385               | -81.1351    |
|              | GrxS15KD     | -112.0175 <sup>*</sup> | 14.93444   | .000 | -150.6329               | -73.4021    |
|              | GrxS15comp   | -218.1528 <sup>*</sup> | 14.93444   | .000 | -256.7681               | -179.5374   |
| GrxS15comp   | WT           | 97.9660 <sup>*</sup>   | 15.10320   | .000 | 58.9143                 | 137.0177    |
|              | GrxS15KD     | 106.1353 <sup>*</sup>  | 14.93444   | .000 | 67.5199                 | 144.7506    |
|              | GrxS15amiR   | 218.1528 <sup>*</sup>  | 14.93444   | .000 | 179.5374                | 256.7681    |

Based on observed means.

The error term is Mean Square(Error) = 7694.795.

\*. The mean difference is significant at the 0.05 level.

#### treatment

#### Multiple Comparisons

Dependent Variable: normOCR

Tukey HSD

| (I) treatment   | (J) treatment   | Mean Difference (I-J) | Std. Error | Sig. | 95% ...     |
|-----------------|-----------------|-----------------------|------------|------|-------------|
|                 |                 |                       |            |      | Lower Bound |
| control         | 5 uM arsenite   | 40.9355 <sup>*</sup>  | 13.36186   | .007 | 9.4394      |
|                 | 200 uM arsenate | -45.6524 <sup>*</sup> | 13.36186   | .002 | -77.1485    |
| 5 uM arsenite   | control         | -40.9355 <sup>*</sup> | 13.36186   | .007 | -72.4316    |
|                 | 200 uM arsenate | -86.5879 <sup>*</sup> | 16.01540   | .000 | -124.3388   |
| 200 uM arsenate | control         | 45.6524 <sup>*</sup>  | 13.36186   | .002 | 14.1563     |
|                 | 5 uM arsenite   | 86.5879 <sup>*</sup>  | 16.01540   | .000 | 48.8369     |
